# Supplementary material for: White-nose syndrome pathology grading in Nearctic and Palearctic bats
Source: PubMed Central journal article supplement (PMC5540284; doi:10.1371/journal.pone.0180435), 2017-08-02
Supplement: pone.0180435.s001.pdf [file pone.0180435.s001.pdf]

**S1 Table. Species sample sizes.** *n* = number of individuals per species undergoing histopathological examination, WNS histo+ = number of individuals confirmed positive for white-nose syndrome.

| Species                          | <i>n</i>   | WNS histo+ |
|----------------------------------|------------|------------|
| <i>Barbastella barbastellus</i>  | 4          | 3          |
| <i>Eptesicus nilssonii</i>       | 4          | 3          |
| <i>Eptesicus serotinus</i>       | 1          | 0          |
| <i>Miniopterus schreibersii</i>  | 6          | 1          |
| <i>Myotis alcathoe</i>           | 7          | 0          |
| <i>Myotis bechsteinii</i>        | 8          | 3          |
| <i>Myotis brandtii</i>           | 3          | 1          |
| <i>Myotis dasycneme</i>          | 19         | 13         |
| <i>Myotis daubentonii</i>        | 21         | 10         |
| <i>Myotis emarginatus</i>        | 8          | 6          |
| <i>Myotis lucifugus</i>          | 10         | 10         |
| <i>Myotis myotis</i>             | 69         | 50         |
| <i>Myotis nattereri</i>          | 10         | 4          |
| <i>Myotis septentrionalis</i>    | 7          | 7          |
| <i>Nyctalus noctula</i>          | 8          | 0          |
| <i>Pipistrellus pipistrellus</i> | 2          | 0          |
| <i>Pipistrellus pygmaeus</i>     | 2          | 0          |
| <i>Plecotus auritus</i>          | 12         | 7          |
| <i>Plecotus austriacus</i>       | 1          | 0          |
| <i>Rhinolophus euryale</i>       | 1          | 1          |
| <i>Rhinolophus hipposideros</i>  | 7          | 4          |
| <b>Total</b>                     | <b>210</b> | <b>123</b> |
